# Supplementary material for: Monthly streamflow forecasting at varying spatial scales in the Rhine basin
Source: Copernicus journal article supplement (doi:10.5194/hess-22-929-2018), 2018-02-02
Supplement: Supplementary file [file hess-22-929-2018-supplement-title-page.pdf › hess-22-929-2018-supplement-title-page.pdf]

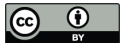

## *Supplement of*

# **Monthly streamflow forecasting at varying spatial scales in the Rhine basin**

**Simon Schick et al.**

*Correspondence to:* Simon Schick ([simon.schick@giub.unibe.ch](mailto:simon.schick@giub.unibe.ch))

- [hess-22-929-2018-supplement-title-page.pdf](#)
- [supplement](#)
  - [Fig3-S4P.png](#)
  - [Fig3-S4PT.png](#)
  - [Fig3-S4Q.png](#)
  - [Fig3-S4T.png](#)
  - [Fig4-S4P.png](#)
  - [Fig4-S4PT.png](#)
  - [Fig4-S4Q.png](#)
  - [Fig4-S4T.png](#)
  - [Fig5-S4P.png](#)
  - [Fig5-S4PT.png](#)
  - [Fig5-S4Q.png](#)
  - [Fig5-S4T.png](#)
  - [Fig7-Basel level 1.png](#)
  - [Fig7-Basel level 2.png](#)
  - [Fig7-Basel level 3.png](#)
  - [Fig7-Lobith level 1.png](#)
  - [Fig7-Lobith level 2.png](#)
  - [Fig7-Lobith level 3.png](#)
  - [Fig8-Basel level 1.png](#)
  - [Fig8-Lobith level 1.png](#)
  - [readme.txt](#)

The copyright of individual parts of the supplement might differ from the CC BY 4.0 License.
